# Supplementary material
Source: publisher figshare collection journal article supplement (https://acs.figshare.com/ndownloader/files/26700313)
Supplement: Supplementary file 1 [file 26700313]

**Supporting Information:**  
**Thickness independent vibrational thermal**  
**conductance across confined solid-solution**  
**thin films**

Ashutosh Giri,<sup>\*,†</sup> Ramez Cheaito,<sup>‡</sup> John T. Gaskins,<sup>‡</sup> Takanori Mimura,<sup>¶</sup>  
Harlan J. Brown-Shaklee,<sup>§</sup> Douglas L. Medlin,<sup>||</sup> Jon F. Ihlefeld,<sup>§,¶,⊥</sup> and  
Patrick E. Hopkins<sup>\*,‡,¶,#</sup>

<sup>†</sup>*Department of Mechanical, Industrial and Systems Engineering, University of Rhode Island,  
Kingston, RI 02881, USA*

<sup>‡</sup>*Department of Mechanical and Aerospace Engineering, University of Virginia, Charlottesville,  
VA 22904, USA*

<sup>¶</sup>*Department of Materials Science and Engineering, University of Virginia, Charlottesville, VA  
22904, USA*

<sup>§</sup>*Sandia National Laboratories, Albuquerque, NM 87123, USA*

<sup>||</sup>*Sandia National Laboratories, Livermore, CA 94550, USA*

<sup>⊥</sup>*Charles L. Brown Department of Electrical and Computer Engineering, University of Virginia,  
Charlottesville, VA 22904, USA*

<sup>#</sup>*Department of Physics, University of Virginia, Charlottesville, VA 22904, USA*

E-mail: ashgiri@uri.edu; phopkins@virginia.edu

## RMS roughness

The RMS roughnesses of the CSTO films prior to CTO deposition was characterized over  $3 \mu\text{m} \times 3 \mu\text{m}$  areas via atomic force microscopy. The roughnesses are provided in the following table. As can be seen, all roughness values are approximately  $2 \text{ \AA}$ , which is one-half of the unit cell step height of STO. As these STO films were prepared with a  $\text{TiO}_2$  termination, this is evidence that the 1 unit cell step height was preserved and that the interfacial roughnesses of all samples in this study are similar.

Table 1: RMS roughnesses measured via atomic force microscopy over  $9 \mu\text{m}^2$  areas on the CSTO films prior to CTO deposition.

| CSTO thickness                                    | RMS roughness ( $\text{\AA}$ ) |
|---------------------------------------------------|--------------------------------|
| 0 nm, $\text{TiO}_2$ -terminated $\text{SrTiO}_3$ | 2.08                           |
| 1 nm                                              | 1.56                           |
| 3 nm                                              | 2.29                           |
| 5 nm                                              | 2.08                           |
| 10 nm                                             | 1.88                           |

## Lattice mismatch

The lattice parameter of  $\text{SrTiO}_3$  is  $3.905 \text{ \AA}$  and the pseudocubic lattice parameter of  $\text{CaTiO}_3$  is  $3.82 \text{ \AA}$ . While we do not have a direct measure of the 50:50 CSTO composition's lattice parameter, use of Vegard's law results in a lattice parameter that is approximately  $3.86 \text{ \AA}$ . The lattice constant mismatches between CSTO and STO and CTO and CSTO are then each approximately 1%. Prior work on  $\text{SrTiO}_3$  grown epitaxially on  $\text{DyScO}_3$ , for which  $\text{DyScO}_3$  has lattice parameters approximately 1 % larger than  $\text{SrTiO}_3$ , revealed the onset of strain relaxation at thicknesses of  $350\text{-}500 \text{ \AA}$  ( $35\text{-}50 \text{ nm}$ ).<sup>1</sup> This value is well beyond the thickness of the CSTO layers in this work. Further,  $\text{CaTiO}_3$  films prepared on LSAT substrates, for which a 1.3 % lattice mismatch exists, have been shown to not strain relax until a thickness of  $20 \text{ nm}$ .<sup>2</sup> For this reason, the assumption of pseudomorphic, strained CSTO layers in this work is reasonable. It is likely that the CTO layers are strain relaxed and our XRD data indicates that the degree of strain relaxation is equivalent as the

out-of-plane lattice parameter of all CTO films was 3.85 Å, as measured from the 004<sub>p</sub> reflection.

## **Cation ordering**

Cation ordering in the CSTO layer is unlikely. From a crystal chemistry perspective, the following conditions favor chemical ordering: 1) a simple crystal structure, 2) a cation concentration ratio of 1:1, 3) large difference in charge between the ordering cations, and 4) large ion size differences between the ordering cations, and 5) a large A-site ion size (for B-site ordering in the perovskite lattice).<sup>3</sup> Of these, CTO and STO may be considered as simple crystal structures and the CSTO mixture satisfies the 1:1 cation ratio. However, there is no formal charge difference between Sr<sup>2+</sup> and Ca<sup>2+</sup> and their ionic radii in 12-fold coordination are 1.58 and 1.48 Å, respectively. Because there is no formal charge difference and the ionic radii difference is small (~6 %), it is highly unlikely that cation ordering would occur.

## **Oxygen vacancies**

Oxygen vacancies will exist in all oxides to some degree. These films were prepared from sintered oxide targets with an oxygen plasma containing 20 % oxygen. The addition of oxygen to the plasma was done to compensate for oxygen loss due to gas-phase scattering during the deposition process. All CSTO films were processed in an identical manner and the CTO layers were deposited in the same deposition run. In depositing the CTO layer at the same time, each CSTO layer was heated in the sputter environment at the same time under the CTO sputter atmosphere conditions. This allowed for equilibration of the oxygen point defect concentrations in the CSTO layers, should any differences exist. As such, each film will have the same thermal/oxygen history and the oxygen point defect concentrations should be identical.

## References

- (1) Biegalski, M. D. et al. Critical thickness of high structural quality SrTiO<sub>3</sub> films grown on orthorhombic (101) DyScO<sub>3</sub>. *Journal of Applied Physics* **2008**, *104*, 114109.
- (2) Biegalski, M. D.; Qiao, L.; Gu, Y.; Mehta, A.; He, Q.; Takamura, Y.; Borisevich, A.; Chen, L.-Q. Impact of symmetry on the ferroelectric properties of CaTiO<sub>3</sub> thin films. *Applied Physics Letters* **2015**, *106*, 162904.
- (3) Setter, N.; Cross, L. E. The contribution of structural disorder to diffuse phase transitions in ferroelectrics. *Journal of Materials Science* **1980**, *15*, 2478–2482.
